# Supplementary material for: Predicting and parameterizing the glass transition temperature of atmospheric organic aerosol components via molecular dynamics simulations
Source: Royal Society of Chemistry journal article supplement (doi:10.1039/d4sm01533a), 2025-01-01
Supplement: d4sm01533a1.pdf [file d4sm01533a1.pdf]

# Electronic Supplementary Information (ESI)

## for

### Predicting and parameterizing the glass transition temperature of atmospheric organic aerosol components via molecular dynamics simulations

Panagiota Siachouli,<sup>a,b</sup> Vlasios G. Mavrantzas<sup>\*,a,b,c</sup> and Spyros N. Pandis<sup>\*,a,b</sup>

<sup>a</sup>Department of Chemical Engineering, University of Patras, Patras, GR 26504, Greece

<sup>b</sup>Institute of Chemical Engineering Sciences (ICE-HT/FORTH), Patras, GR 26504, Greece

<sup>c</sup>Particle Technology Laboratory, Department of Mechanical and Process Engineering, ETH Zürich, Zürich CH-8092, Switzerland

#### S1. $T_g$ predictions from MD simulations

**Table S1:** MD predictions for the  $T_g$  of all compounds. Values from the two methods (density and energy of non-bonded potential energy as a function of temperature) implemented to predict  $T_g$  and comparison with available experimental data.

| Compound              | $T_g$ (K) based on density | $T_g$ (K) based on non-bonded potential energy | $T_g$ (K) experimental |
|-----------------------|----------------------------|------------------------------------------------|------------------------|
| 1-propanol            | $118.2 \pm 0.4^1$          | $118.5 \pm 6.5^1$                              | $100 \pm 7^2$          |
| 2-propanol            | $130.2 \pm 0.4^1$          | $130.9 \pm 1^1$                                | $119.4 \pm 4^2$        |
| 1,2-propanediol       | $171.2 \pm 4.6^1$          | $180 \pm 0.5^1$                                | $170 \pm 3^2$          |
| 1,3-propanediol       | $175.9 \pm 3.8^1$          | $178.4 \pm 0.3^1$                              | $148 \pm 8^2$          |
| 1,2,3-propanetriol    | $216.2 \pm 6.5^1$          | $218.9 \pm 5.8^1$                              | $189 \pm 7^2$          |
| 1-hexanol             | $149.6 \pm 7.1^1$          | $150.7 \pm 0.8^1$                              | N/A                    |
| 1,6-hexanediol        | $242.4 \pm 5.7^1$          | $242.2 \pm 7.1^1$                              | N/A                    |
| 1,2,6-hexanetriol     | $258.3 \pm 13.4^1$         | $257.9 \pm 9.2^1$                              | $204 \pm 6^2$          |
| 1-nonanol             | $167.3 \pm 2.2$            | $168.5 \pm 0.5$                                | $153^2$                |
| 1,2-nonanediol        | $251.6 \pm 4.6$            | $248.7 \pm 12.1$                               | N/A                    |
| 1,2,9-nonanetriol     | $264.4 \pm 0.5$            | $266.1 \pm 1.6$                                | N/A                    |
| 1-dodecanol           | $187.6 \pm 1.4$            | $185.3 \pm 2.1$                                | N/A                    |
| 1,2-dodecanediol      | $259.4 \pm 2.3$            | $266.9 \pm 1.3$                                | N/A                    |
| cyclohexanol          | $173.5 \pm 0.6$            | $173.8 \pm 0.6$                                | $161^3$                |
| cyclohexanediol       | $271.4 \pm 5.5$            | $273.7 \pm 6.1$                                | N/A                    |
| cyclohexanetriol      | $285.8 \pm 1.2$            | $286.4 \pm 0.8$                                | N/A                    |
| cyclononanol          | $186.3 \pm 1.8$            | $190.3 \pm 0.35$                               | N/A                    |
| Propionic acid        | $159.6 \pm 5.9^1$          | $160.6 \pm 6.2^1$                              | N/A                    |
| Malonic acid          | $275.3 \pm 2^1$            | $271.7 \pm 0.6^1$                              | N/A                    |
| Hexanoic acid         | $183.2 \pm 7.2^1$          | $183.3 \pm 8^1$                                | N/A                    |
| Adipic acid           | $280.2 \pm 12.2^1$         | $278.8 \pm 11.9^1$                             | N/A                    |
| Tricarballic acid     | $316.2 \pm 1.1^1$          | $314.2 \pm 0.5^1$                              | N/A                    |
| Suberic acid          | $303.4 \pm 3.9^1$          | $290.5 \pm 0.7^1$                              | N/A                    |
| Dimethylsuccinic acid | $312.1 \pm 3.6^1$          | $312.3 \pm 2.7^1$                              | N/A                    |

|                                        |                   |                    |                |
|----------------------------------------|-------------------|--------------------|----------------|
| Dimethylhexanedioic acid               | $297.3 \pm 1.7^1$ | $296.5 \pm 1.4^1$  | N/A            |
| Cyclobutanedicarboxylic acid           | $315.9 \pm 6.2^1$ | $309.5 \pm 0.6^1$  | N/A            |
| Norpinic acid                          | $320.7 \pm 0.7^1$ | $320.4 \pm 1^1$    | N/A            |
| 3-methyl-1,2,3-butanedicarboxylic acid | $336.7 \pm 6.7^1$ | $351.2 \pm 11.1^1$ | $305 \pm 2^4$  |
| Nonanoic acid                          | $195.3 \pm 6.9$   | $201.6 \pm 0.8$    | N/A            |
| Azelaic acid                           | $302.1 \pm 1.3$   | $303.5 \pm 1.7$    | N/A            |
| Dodecanoic acid                        | $200 \pm 3.4$     | $204.1 \pm 1.1$    | N/A            |
| Dodecanedioic acid                     | $316.3 \pm 3.1$   | $295.3 \pm .6$     | N/A            |
| Cyclopentanedicarboxylic acid          | $215.6 \pm 1.7$   | $212. \pm 12$      | N/A            |
| Cycloheptanedicarboxylic acid          | $242.4 \pm 1.7$   | $243.9 \pm 1.2$    | N/A            |
| 2-propanone                            | $112 \pm 0.45$    | $108.8 \pm 1.9$    | $100^3$        |
| Propanal                               | $105.5 \pm 1.8$   | $104.7 \pm 0.4$    | N/A            |
| 2-hexanone                             | $133.9 \pm 1.4$   | $133.6 \pm 0.9$    | N/A            |
| Hexanal                                | $122.9 \pm 0.5$   | $122.6 \pm 1.3$    | N/A            |
| 2-Nonanone                             | $165.6 \pm 0.3$   | $163.3$            | N/A            |
| Nonanal                                | $157.2 \pm 0.5$   | $152.2 \pm 2.4$    | N/A            |
| Diacetyl                               | $162.6 \pm 4.9$   | $155.2 \pm 3.3$    | N/A            |
| Cyclopropanone                         | $118.3 \pm 0.8$   | $106.5 \pm 0.9$    | N/A            |
| Cyclohexanone                          | $161.3 \pm 2$     | $153.8 \pm 1.2$    | N/A            |
| Cyclononanone                          | $181.3 \pm 1$     | $181.6 \pm 1.1$    | N/A            |
| Pyruvic acid                           | $192.6 \pm 2.6$   | $192.9 \pm 1.9$    | N/A            |
| 5-Oxohexanoic acid                     | $205.3 \pm 0.9$   | $204.8 \pm 1.1$    | N/A            |
| 6-Oxononanoic acid                     | $225 \pm 1.4$     | $227.1 \pm 0.2$    | N/A            |
| Oxomalonic acid                        | $285.7 \pm 2.1$   | $286.1 \pm 4.2$    | N/A            |
| 2-Oxoadipic acid                       | $294.2 \pm 3.4$   | $286.3 \pm 0.4$    | N/A            |
| Lactic acid                            | $213.2 \pm 11.8$  | $220.8 \pm 2.52$   | $207 \pm 18^2$ |
| Tartronic acid                         | $288.4 \pm 2.7$   | $288.2 \pm 2.9$    | N/A            |
| Hydroxy acetone                        | $162.4 \pm 2.5$   | $163 \pm 1$        | N/A            |
| Dihydroxy acetone                      | $206.3 \pm 3$     | $305.9 \pm 1.3$    | N/A            |
| Cis-pinonic acid                       | $255.1 \pm 2.2^1$ | $255 \pm 0.9^1$    | N/A            |
| Pinonaldehyde                          | $185.1 \pm 1.9^1$ | $184.7 \pm 2.2^1$  | N/A            |

## S2. Effect of molecular weight and O:C ratio per category of compounds

### A) Carbonyls

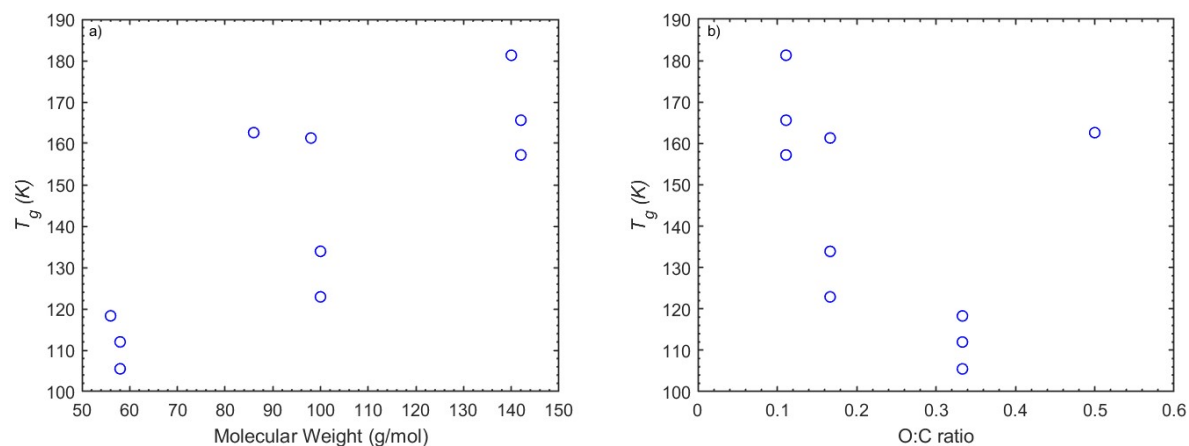

Figure S1:  $T_g$  as a function of molecular weight (a) and O:C ratio (b) for the carbonyls.

### B) Hydroxyls

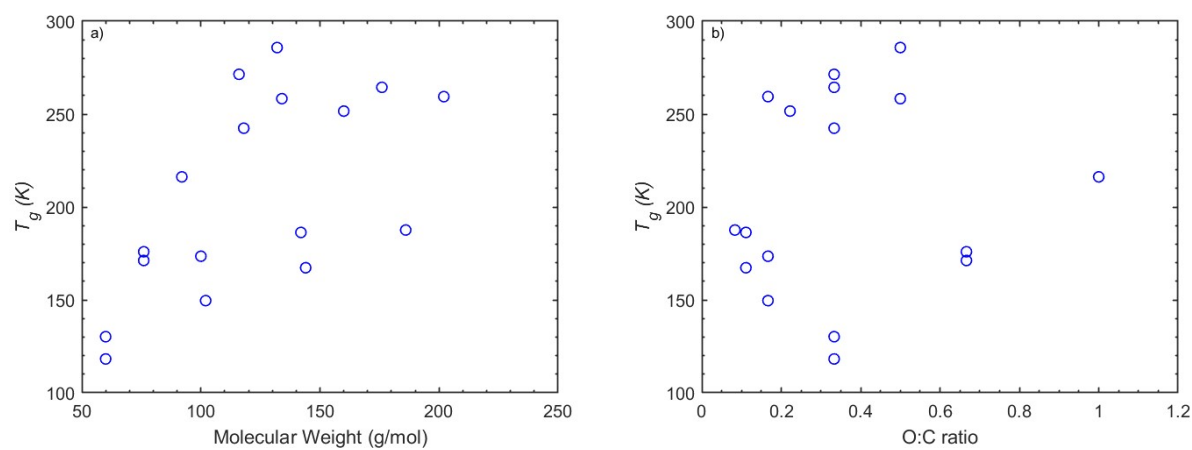

Figure S2:  $T_g$  as a function of molecular weight (a) and O:C ratio (b) for the hydroxyls.

### C) Carboxyls

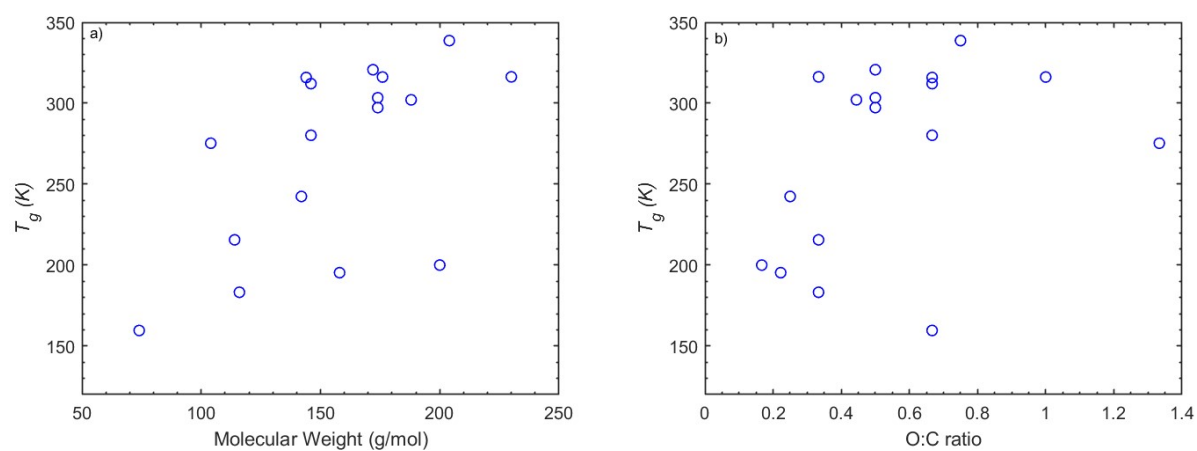

**Figure S3:**  $T_g$  as a function of molecular weight (a) and O:C ratio (b) for the carboxyls.

### D) Multifunctionals

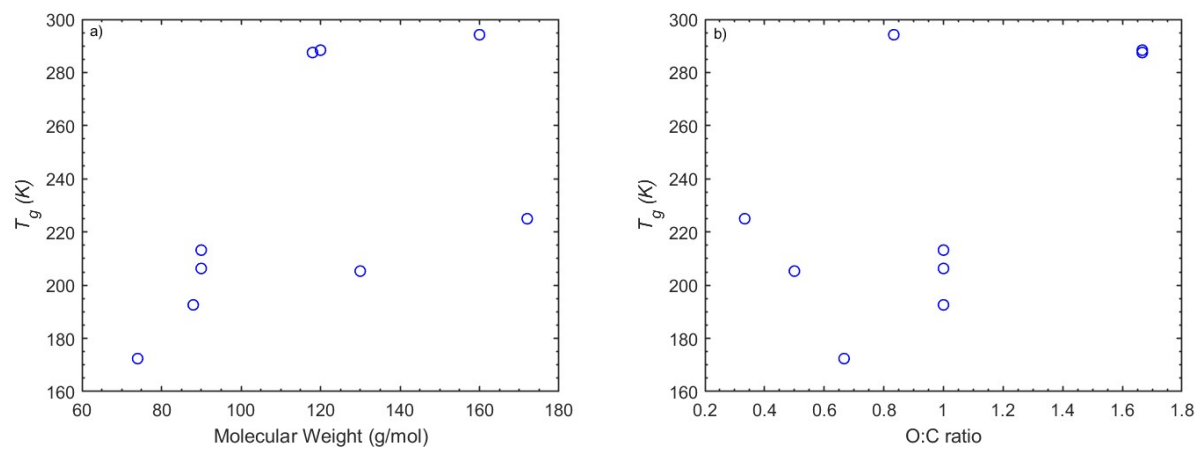

**Figure S4:**  $T_g$  as a function of molecular weight (a) and O:C ratio (b) for the multifunctional compounds.

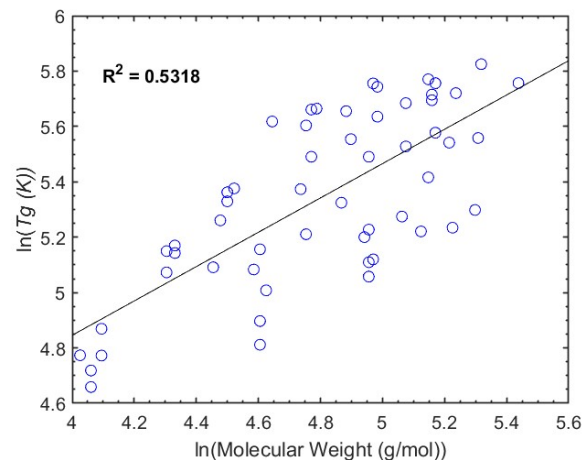

**Figure S5:** Correlation of the glass transition temperature ( $T_g$ ) with the molecular weight ( $M$ ) for the entire dataset. The MD data have been fitted with a power-law of the form  $T_g \propto M^\alpha$  as suggested by Novikov and Rössler (2013)<sup>5</sup> and the best fitting has been obtained for  $\alpha = 0.62$ .

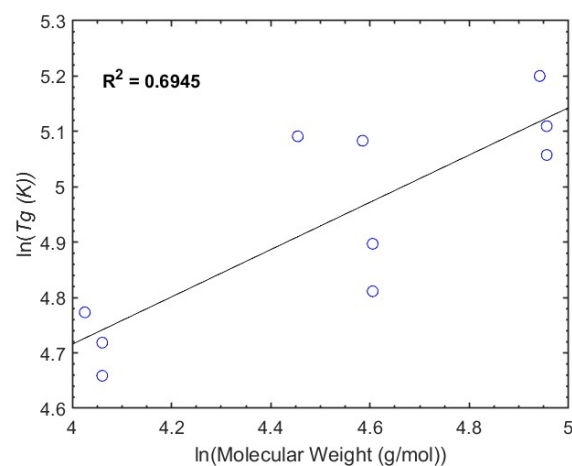

**Figure S6:** Correlation of the glass transition temperature ( $T_g$ ) with the molecular weight ( $M$ ) for the carbonyls. The MD data have been fitted with a power-law of the form  $T_g \propto M^\alpha$  as suggested by Novikov and Rössler (2013)<sup>5</sup> and the best fitting has been obtained for  $\alpha = 0.42$ .

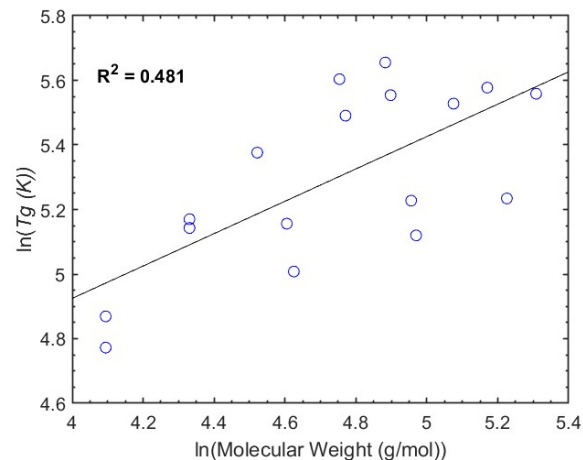

**Figure S7:** Correlation of the glass transition temperature ( $T_g$ ) with the molecular weight ( $M$ ) for the alcohols. The MD data have been fitted with a power-law of the form  $T_g \propto M^\alpha$  as suggested by Novikov and Rössler (2013)<sup>5</sup> and the best fitting has been obtained for  $\alpha = 0.50$ .

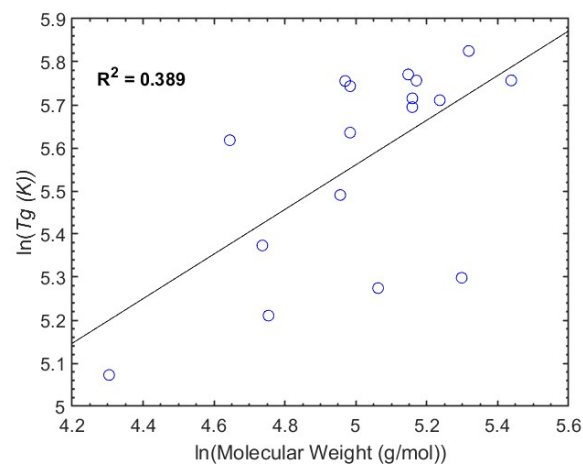

**Figure S8:** Correlation of the glass transition temperature ( $T_g$ ) with the molecular weight ( $M$ ) for the carboxylic acids. The MD data have been fitted with a power-law of the form  $T_g \propto M^\alpha$  as suggested by Novikov and Rössler (2013)<sup>5</sup> and the best fitting has been obtained for  $\alpha = 0.51$ .

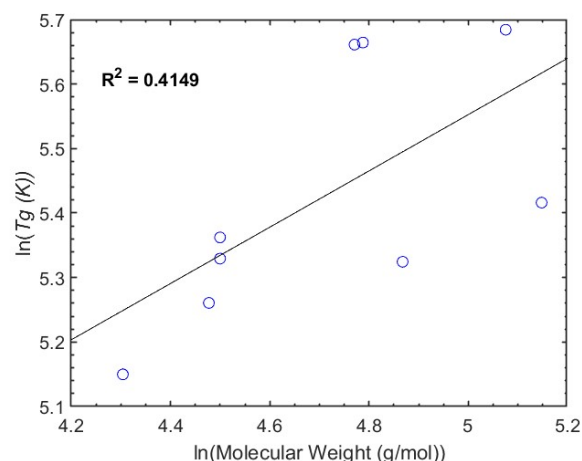

**Figure S9:** Correlation of the glass transition temperature ( $T_g$ ) with the molecular weight ( $M$ ) for the multifunctional organic compounds. The MD data have been fitted with a power-law of the form  $T_g \propto M^a$  as suggested by Novikov and Rössler (2013)<sup>5</sup> and the best fitting has been obtained for  $a = 0.43$ .

### S3. Evaluation of the sensitivity of dataset

To investigate the robustness and sensitivity of our parameterization we examine the variation of the contribution factors. The variation is examined using the leave-one-out scenario, in which we remove all the datapoints once and examine the change in the contribution for each factor considered.

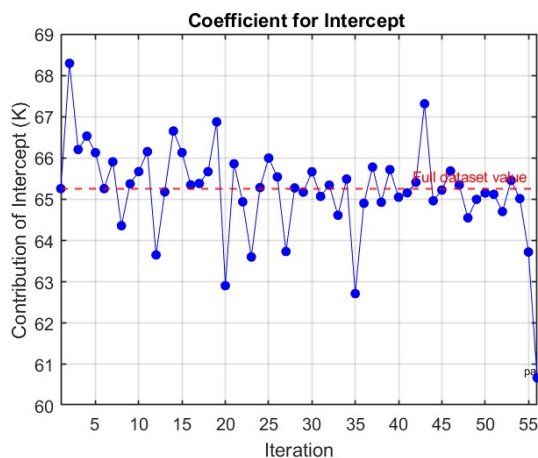

**Figure S10:** Variation of the intercept's contribution in a leave-one-out scenario with a 5% tolerance threshold. The annotated compounds are those whose removal causes the intercept to deviate by more than 5%.

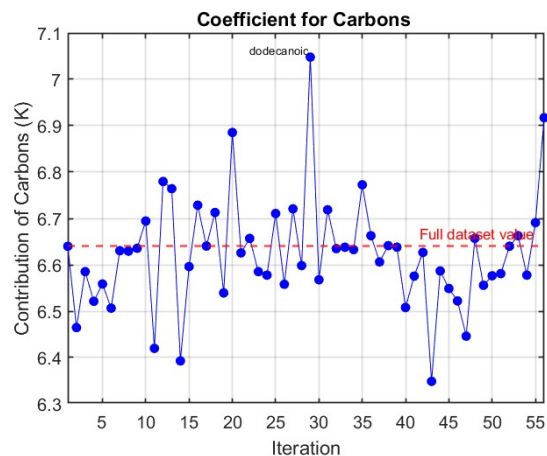

**Figure S11:** Variation of the intercept's contribution in a leave-one-out scenario with a 5% tolerance threshold. The annotated compounds are those whose removal causes the contribution of carbons to deviate by more than 5%.

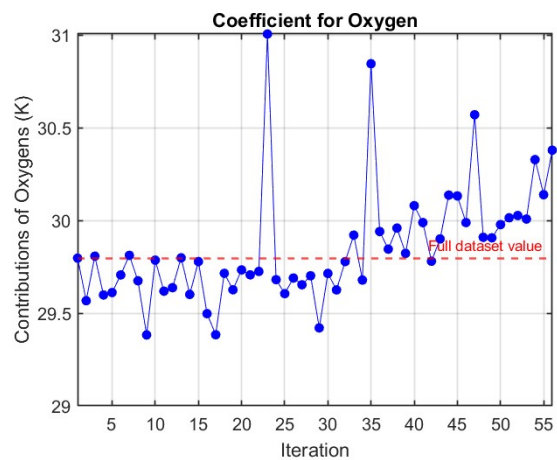

**Figure S12:** Variation of the intercept's contribution in a leave-one-out scenario with a 5% tolerance threshold. The annotated compounds are those whose removal causes the contribution of oxygens to deviate by more than 5%.



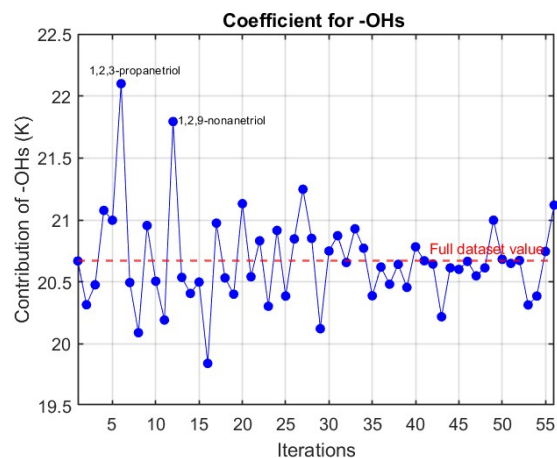

**Figure S13:** Variation of the intercept's contribution in a leave-one-out scenario with a 5% tolerance threshold. The annotated compounds are those whose removal causes the contribution of hydroxyls to deviate by more than 5%.

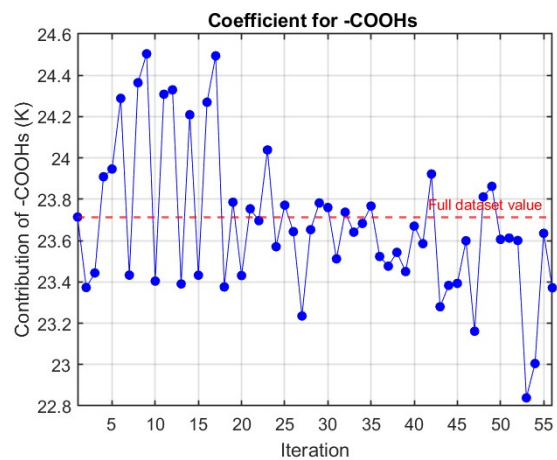

**Figure S14:** Variation of the intercept's contribution in a leave-one-out scenario with a 5% tolerance threshold. The annotated compounds are those whose removal causes the contribution of carboxyls to deviate by more than 5%.

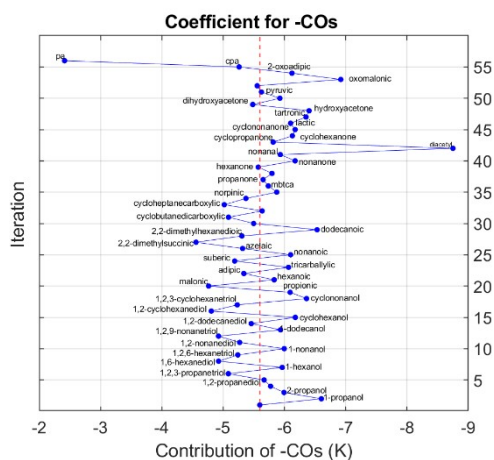

**Figure S15:** Variation of the intercept's contribution in a leave-one-out scenario with a 5% tolerance threshold. The annotated compounds are those whose removal causes the contribution of carbonyls to deviate by more than 5%.

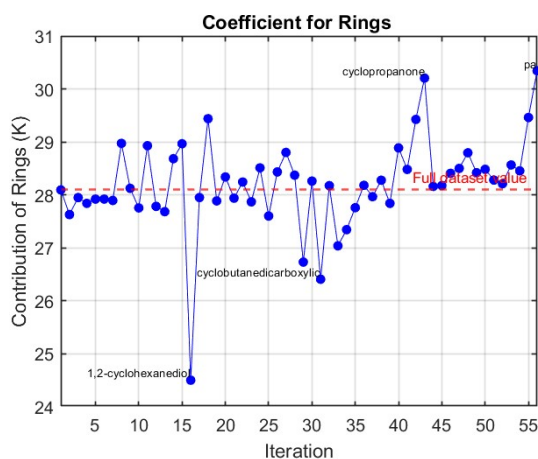

**Figure S16:** Variation of the intercept's contribution in a leave-one-out scenario with a 5% tolerance threshold. The annotated compounds are those whose removal causes the contribution of rings to deviate by more than 5%.

#### S4. Estimating the Glass Transition Temperature using the VFT equation

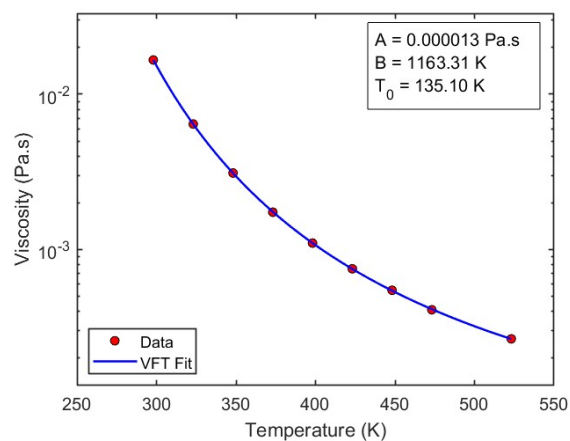

**Figure S17:** Indirect estimation of the  $T_g$  of 1-dodecanol by fitting the viscosity data of Fu et al.<sup>6</sup> with the VFT equation, Eq. (2) in the main text.

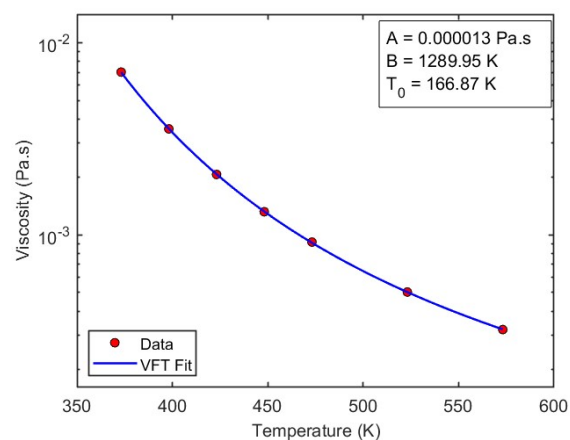

**Figure S18:** Indirect estimation of the  $T_g$  of 1,12-dodecanediol by fitting the viscosity data of Fu et al.<sup>6</sup> with the VFT equation, Eq. (2) in the main text.

## S5. Comparison with other parameterizations

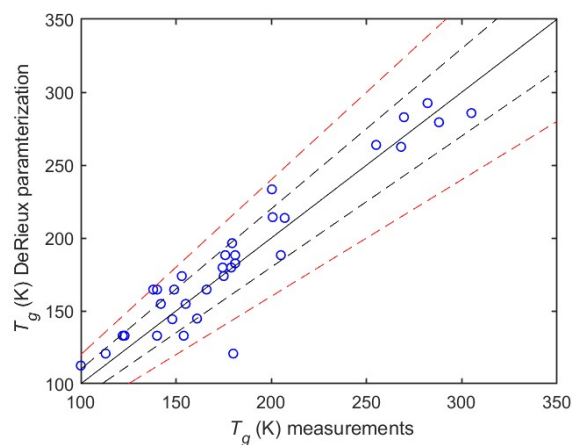

**Figure S19:** Comparison of the DeRieux et al.<sup>7</sup> parametrization against measurements. The solid line is the 1:1 curve while the dashed black line indicates the  $\pm 10\%$ , and the dashed red line represents the  $\pm 20\%$  deviations from 1:1.

## References

- 1 P. Siachouli, K. S. Karadima, V. G. Mavrantzas and S. N. Pandis, *Soft Matter*, 2024, **20**, 4783–4794.
- 2 N. E. Rothfuss and M. D. Petters, *Environ. Sci. Technol.*, 2017, **51**, 271–279.
- 3 C. A. Angell, J. M. Sare and E. J. Sare, *J. Phys. Chem.*, 1978, **82**, 2622–2629.
- 4 H. P. Dette, M. Qi, D. C. Schröder, A. Godt and T. Koop, *J. Phys. Chem. A*, 2014, **118**, 7024–7033.
- 5 V. N. Novikov and E. A. Rössler, *Polymer (Guildf.)*, 2013, **54**, 6987–6991.
- 6 Y. Fu, X. Meng, X. Liang and J. Wu, *J. Chem. Eng. Data*, 2021, **66**, 712–721.
- 7 W. S. W. DeRieux, Y. Li, P. Lin, J. Laskin, A. Laskin, A. K. Bertram, S. A. Nizkorodov and M. Shiraiwa, *Atmos. Chem. Phys.*, 2018, **18**, 6331–6351.
